# Supplementary material
Source: PubMed Central journal article supplement (PMC2154476)

# ABR

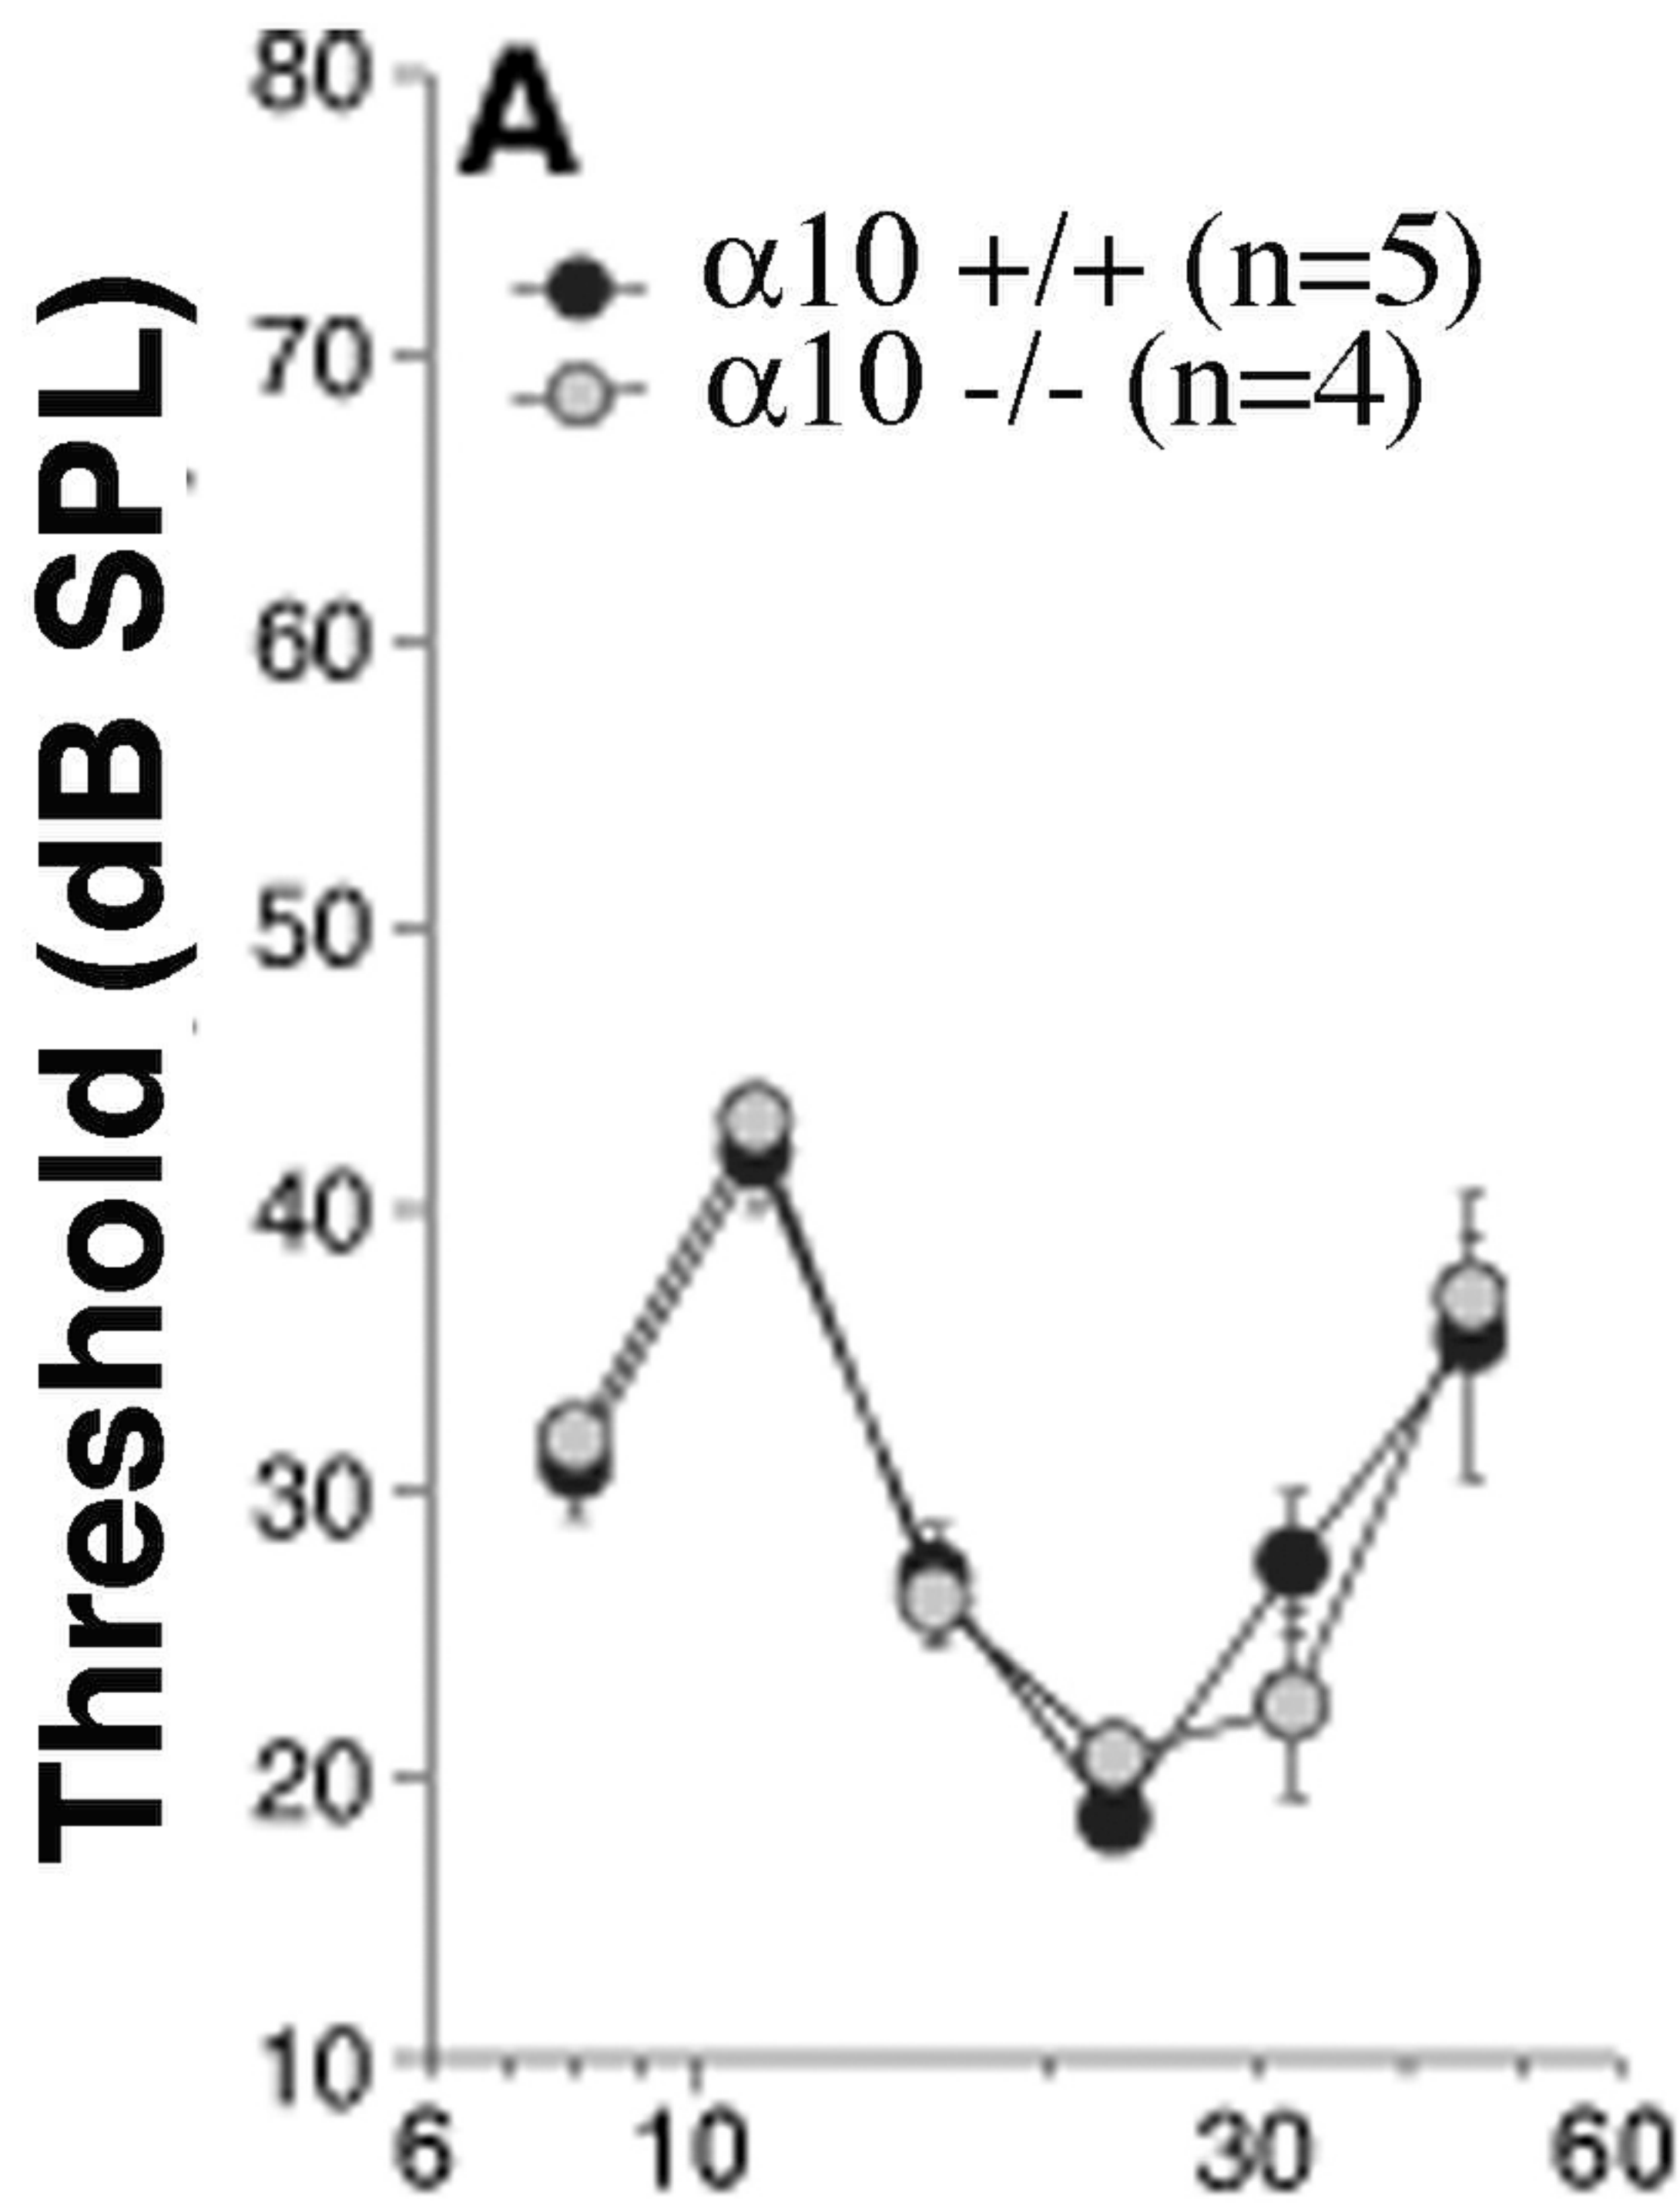

# Amplitude ( $\mu V$ Wave 1)

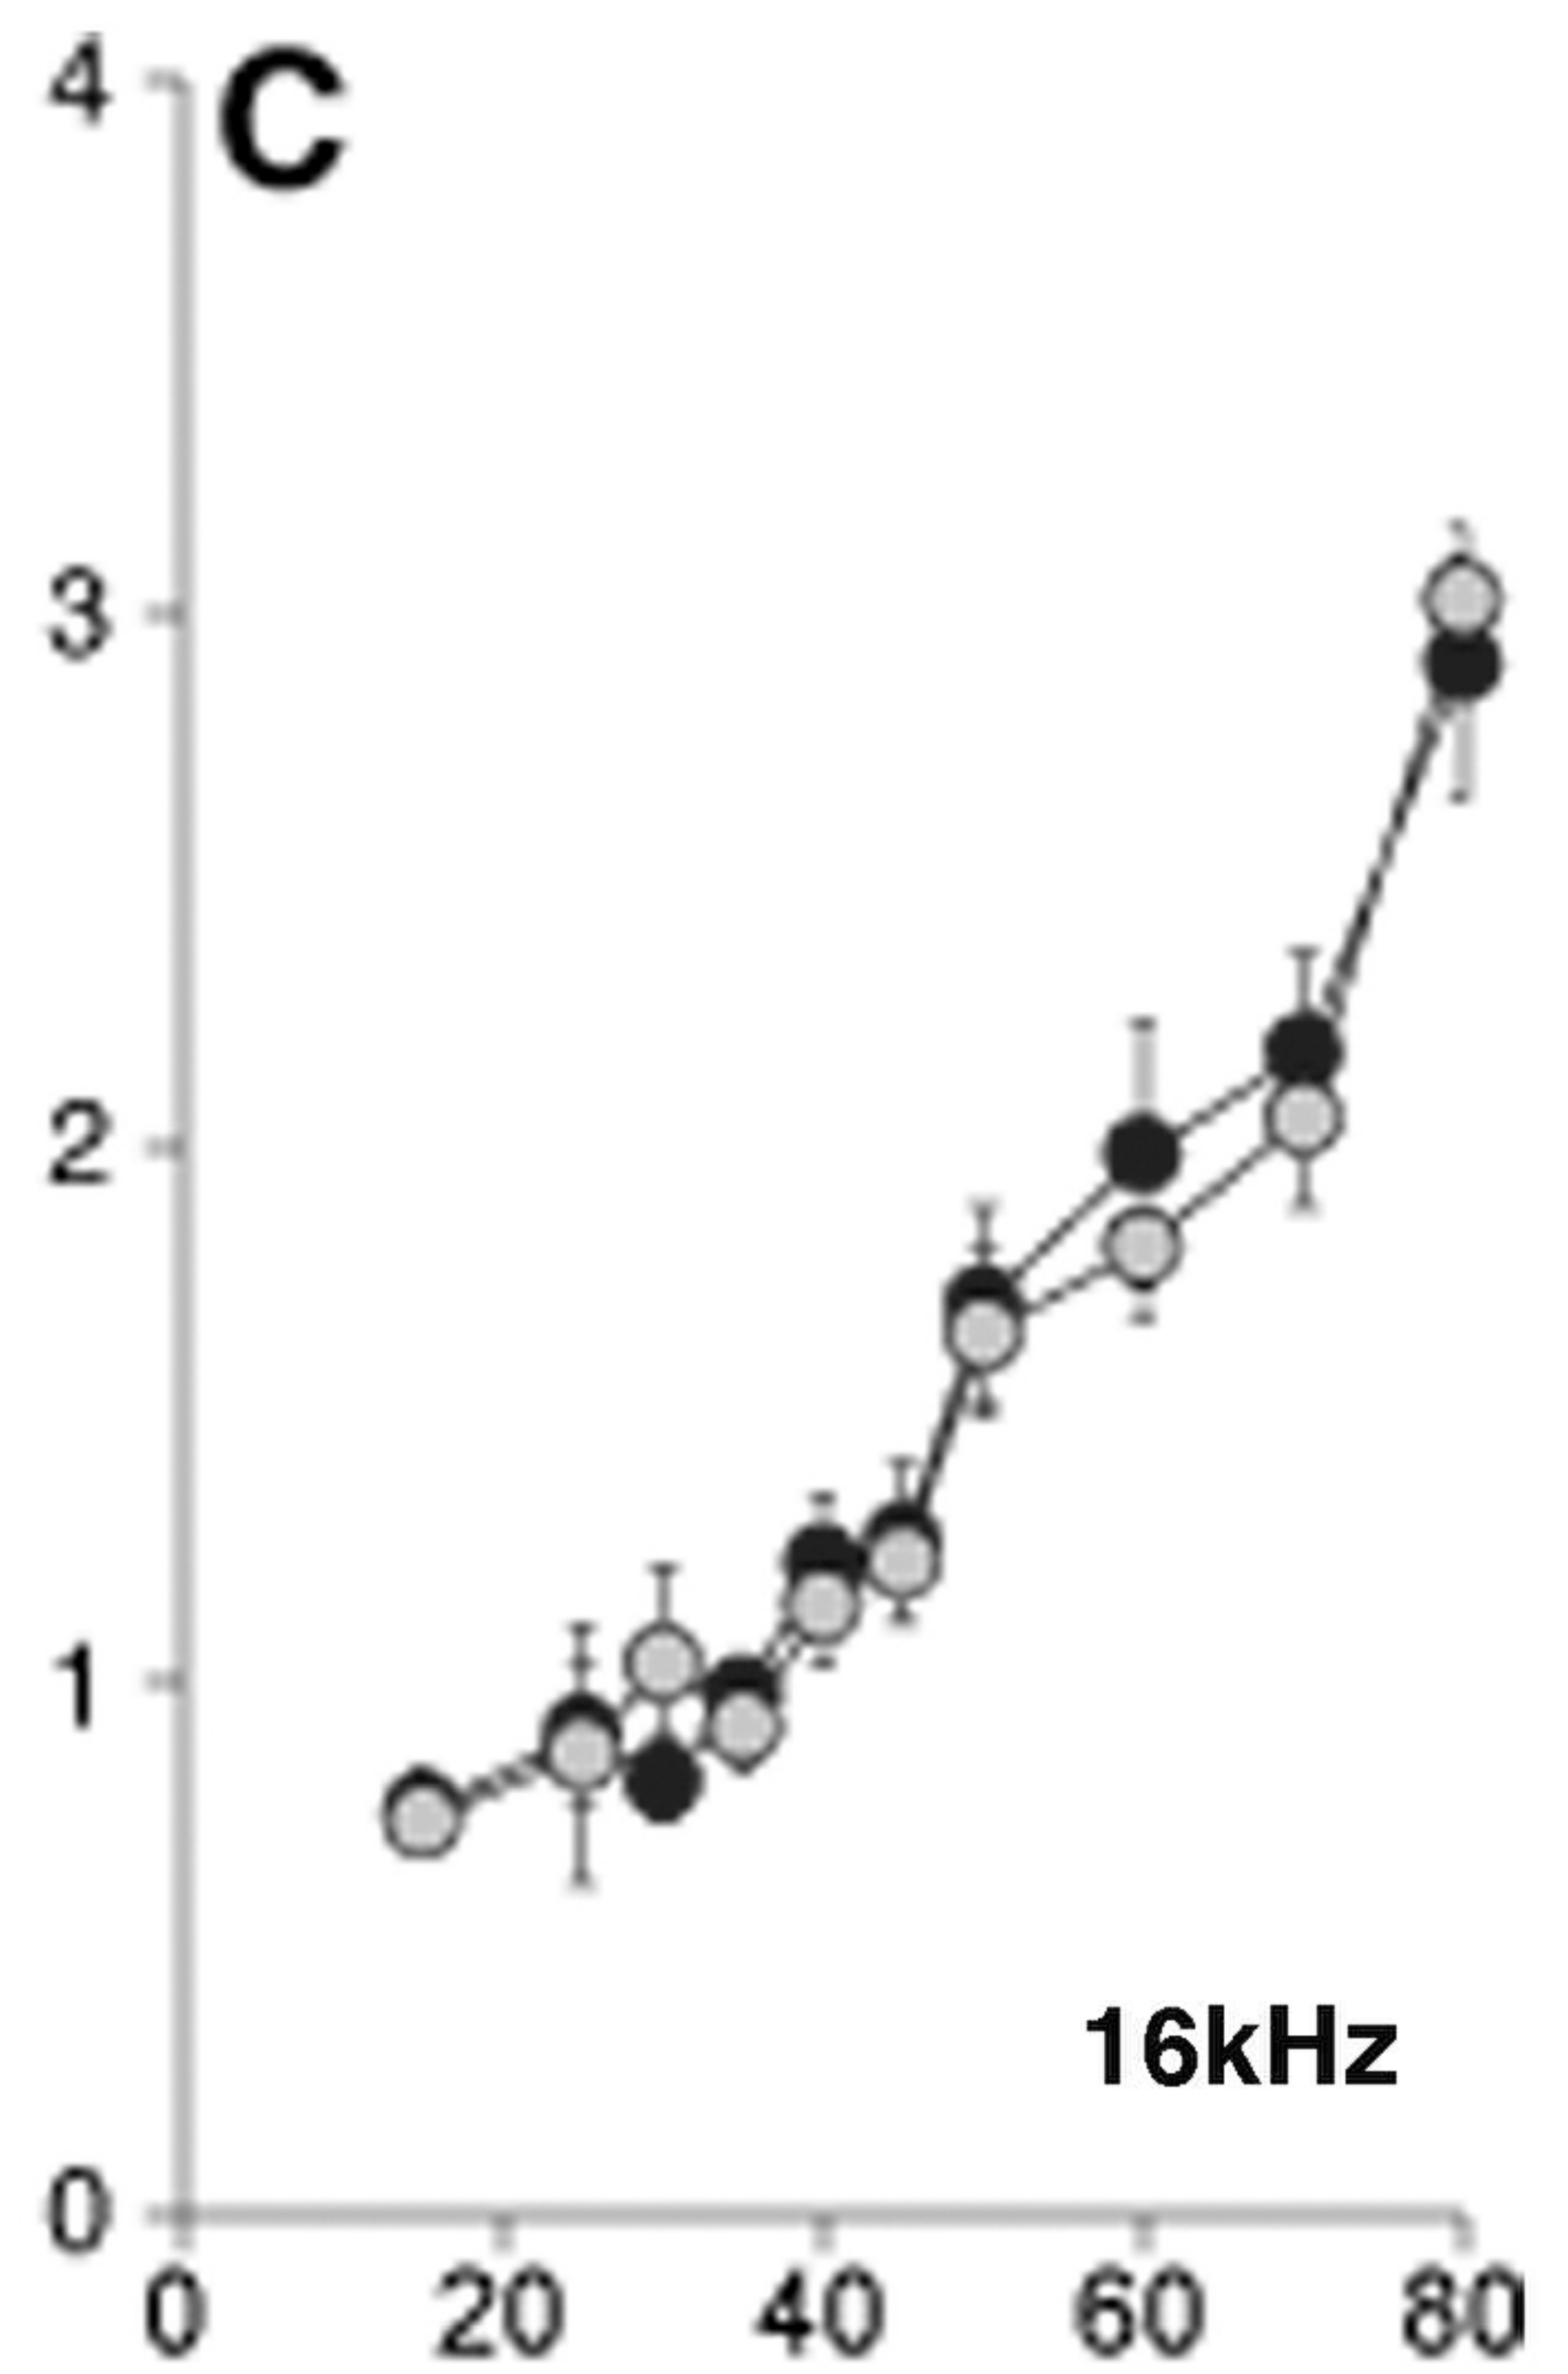

# DPOAE

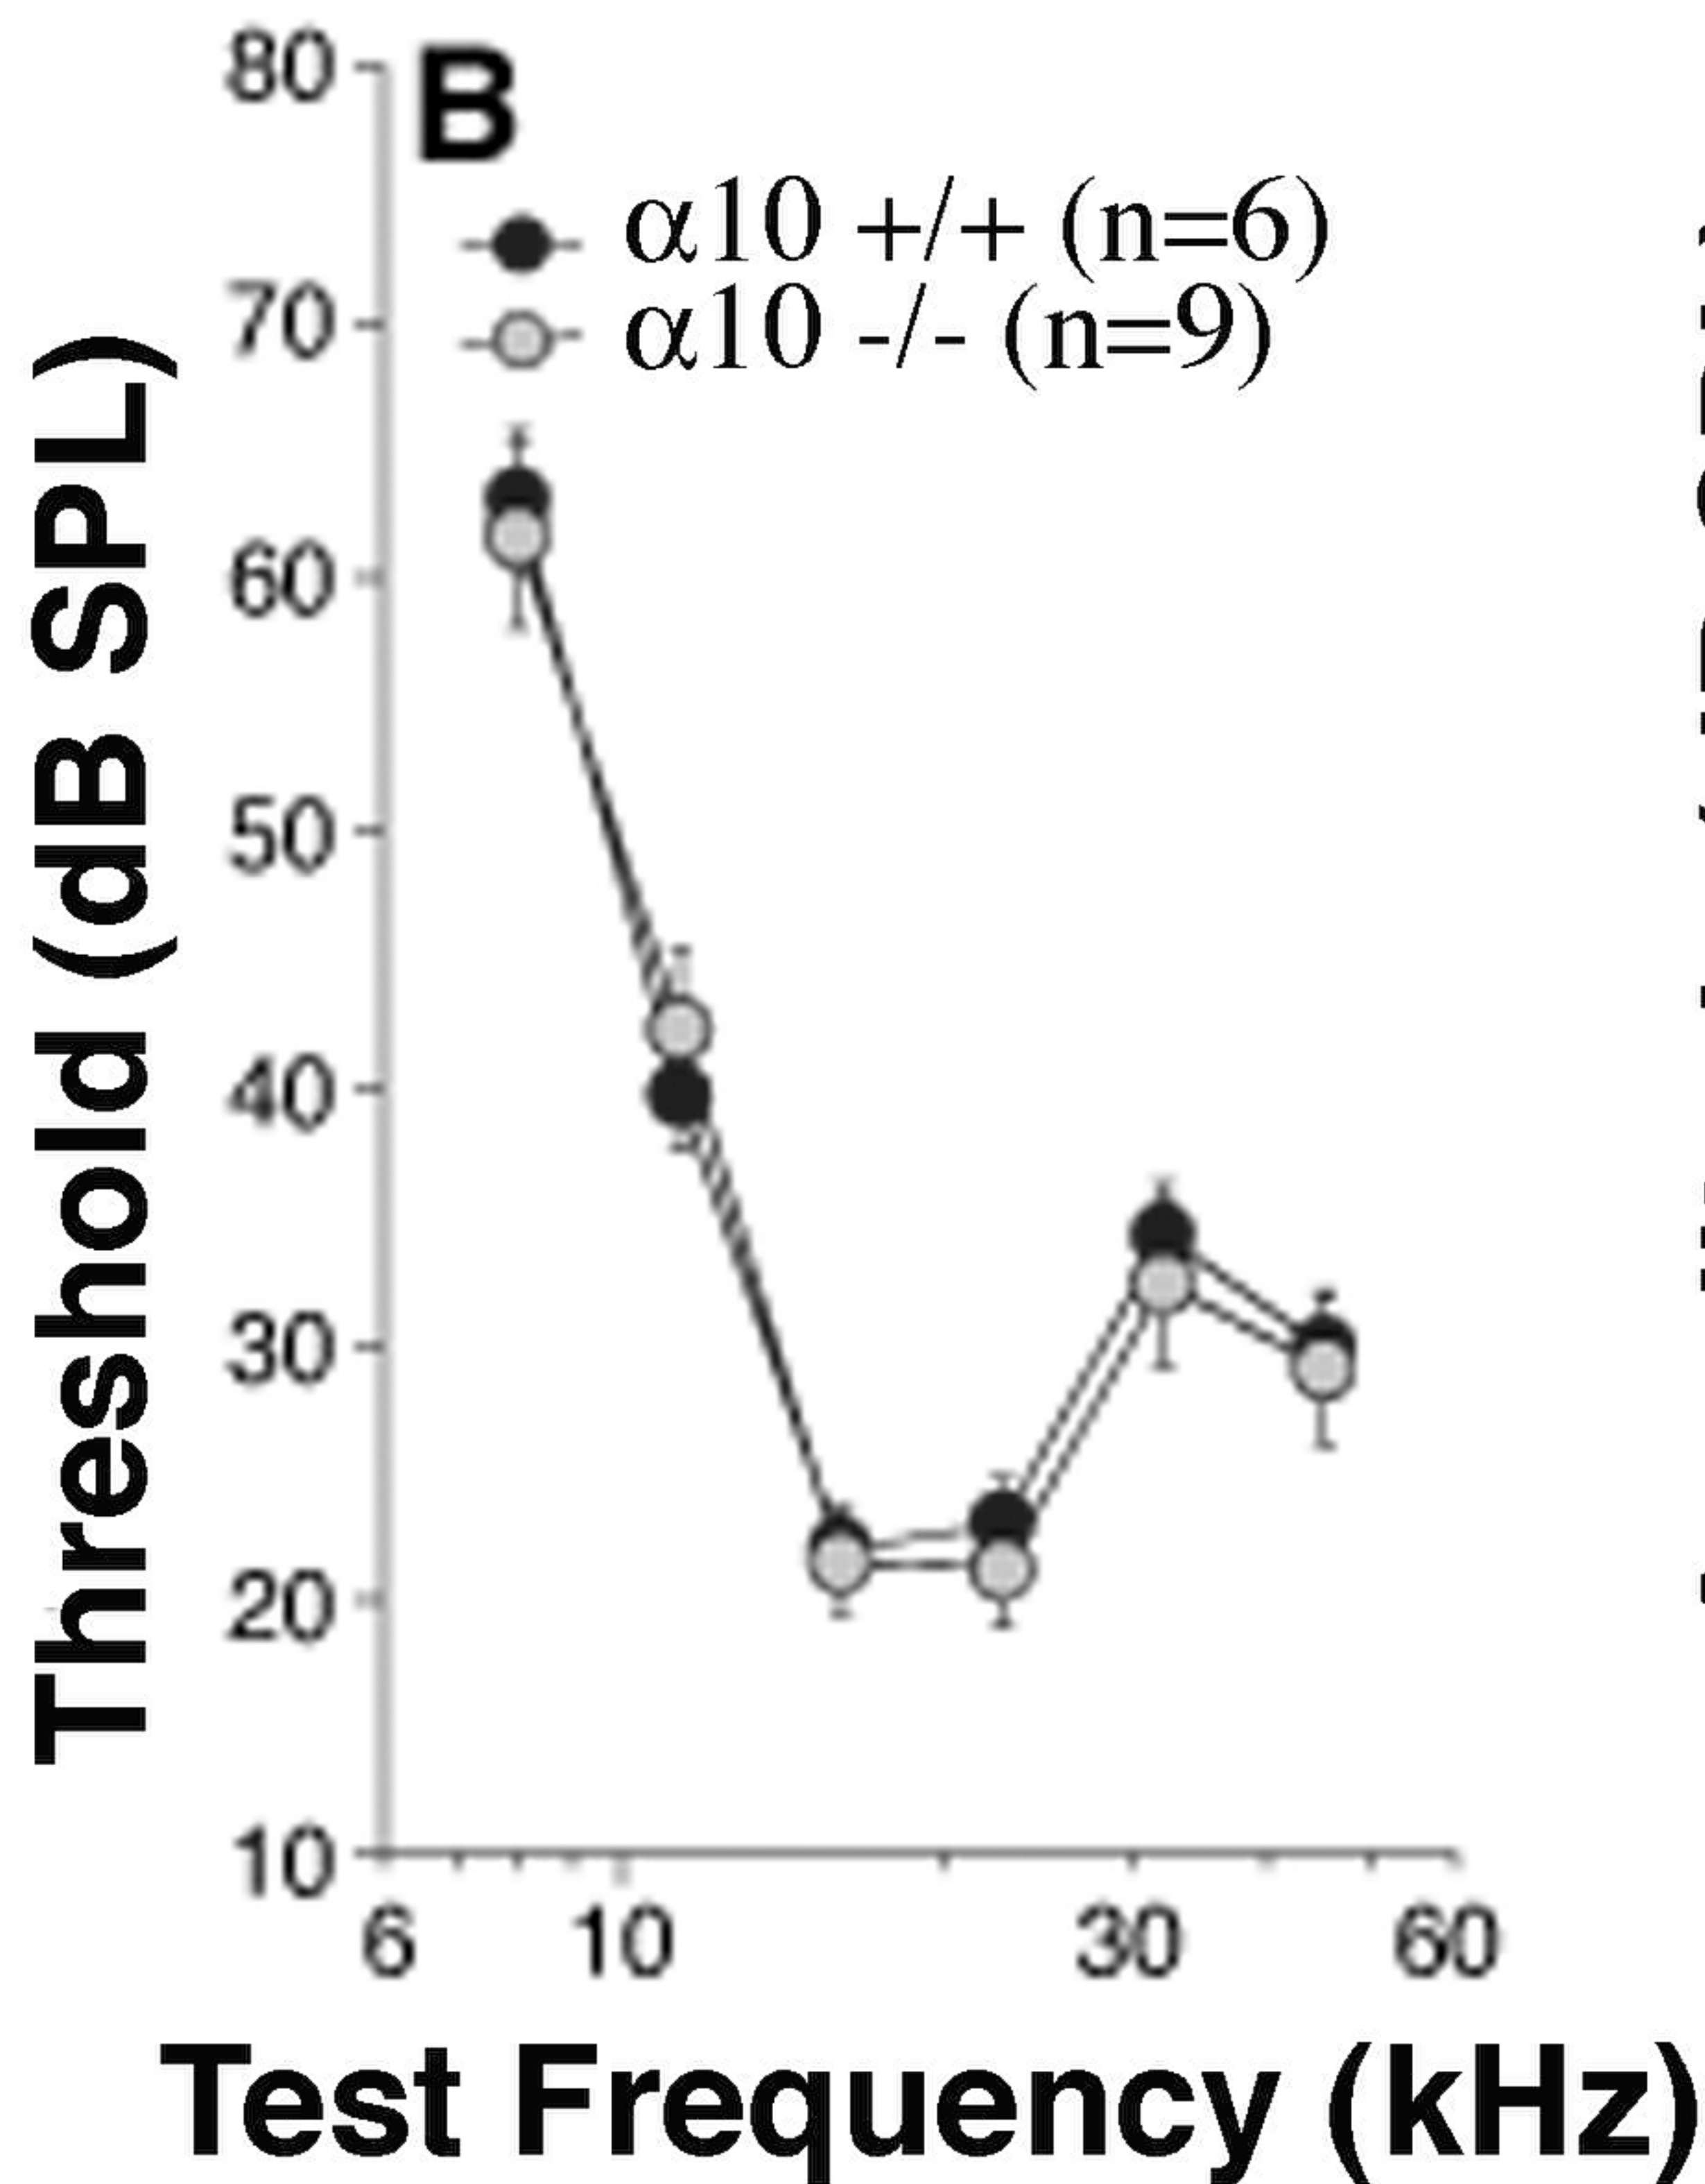

# Amplitude (dB SPL)

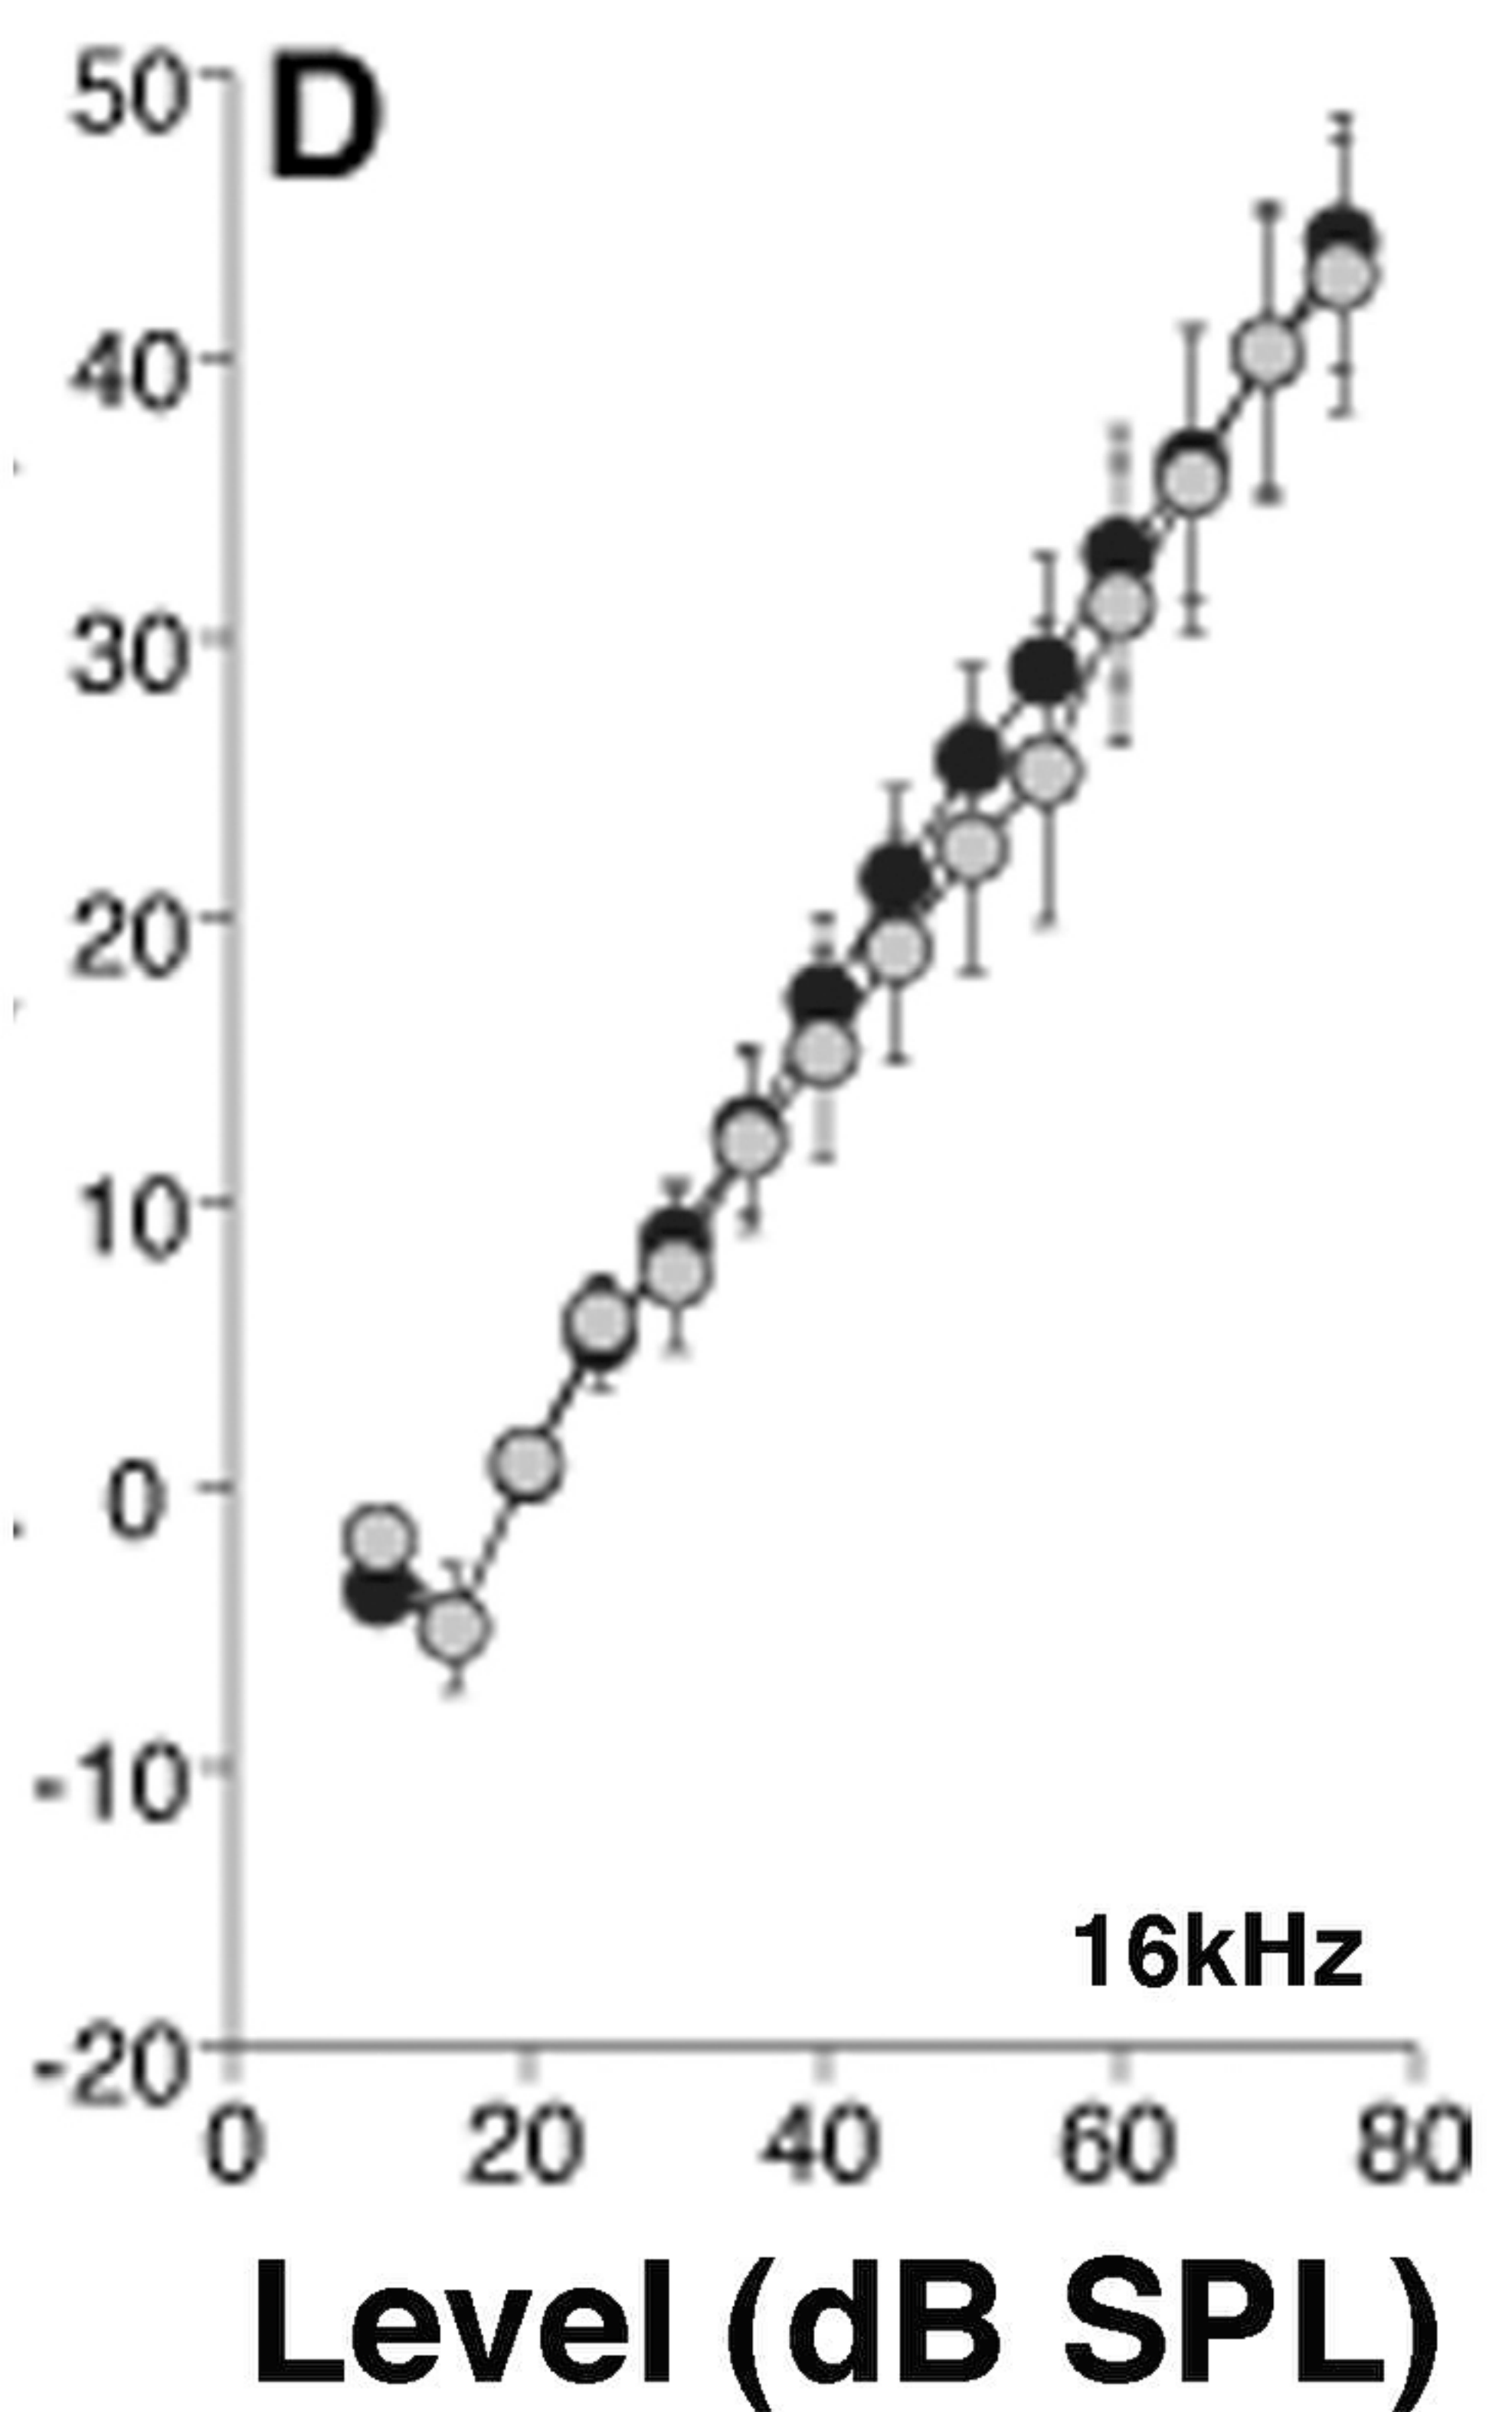

Supplement: supp_0708545105_08545Fig6.pdf [file supp_0708545105_08545Fig6.pdf]

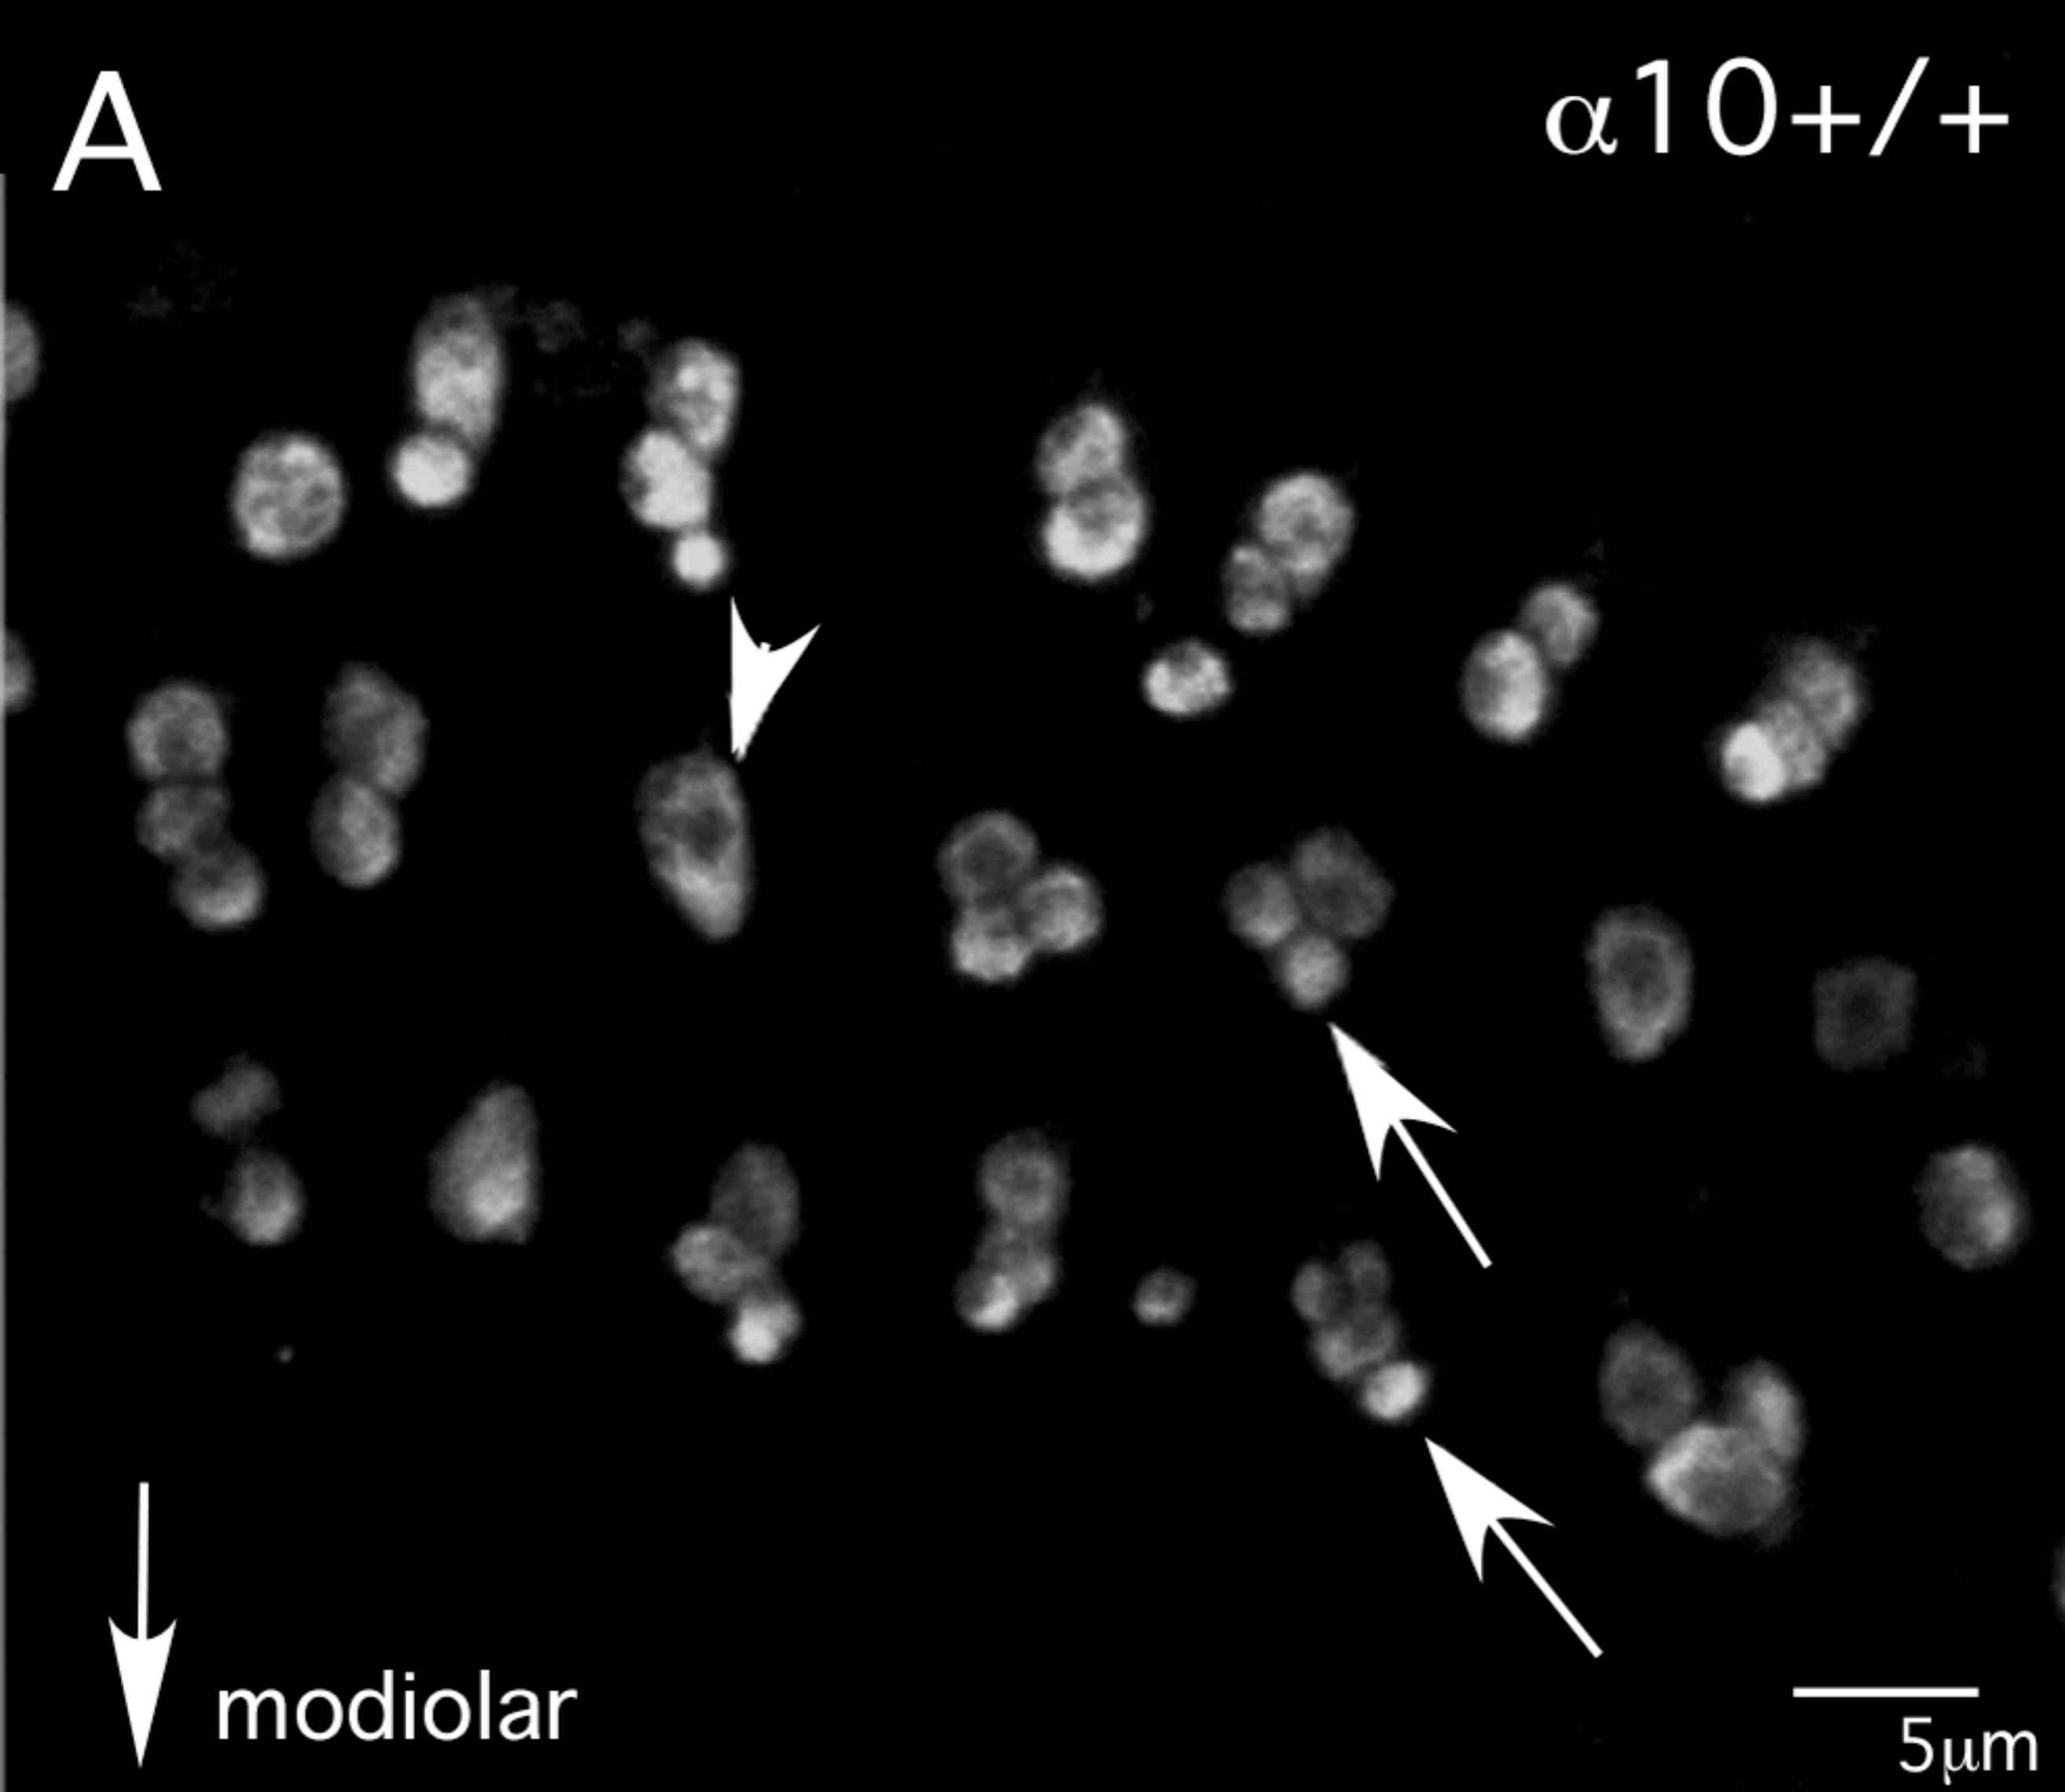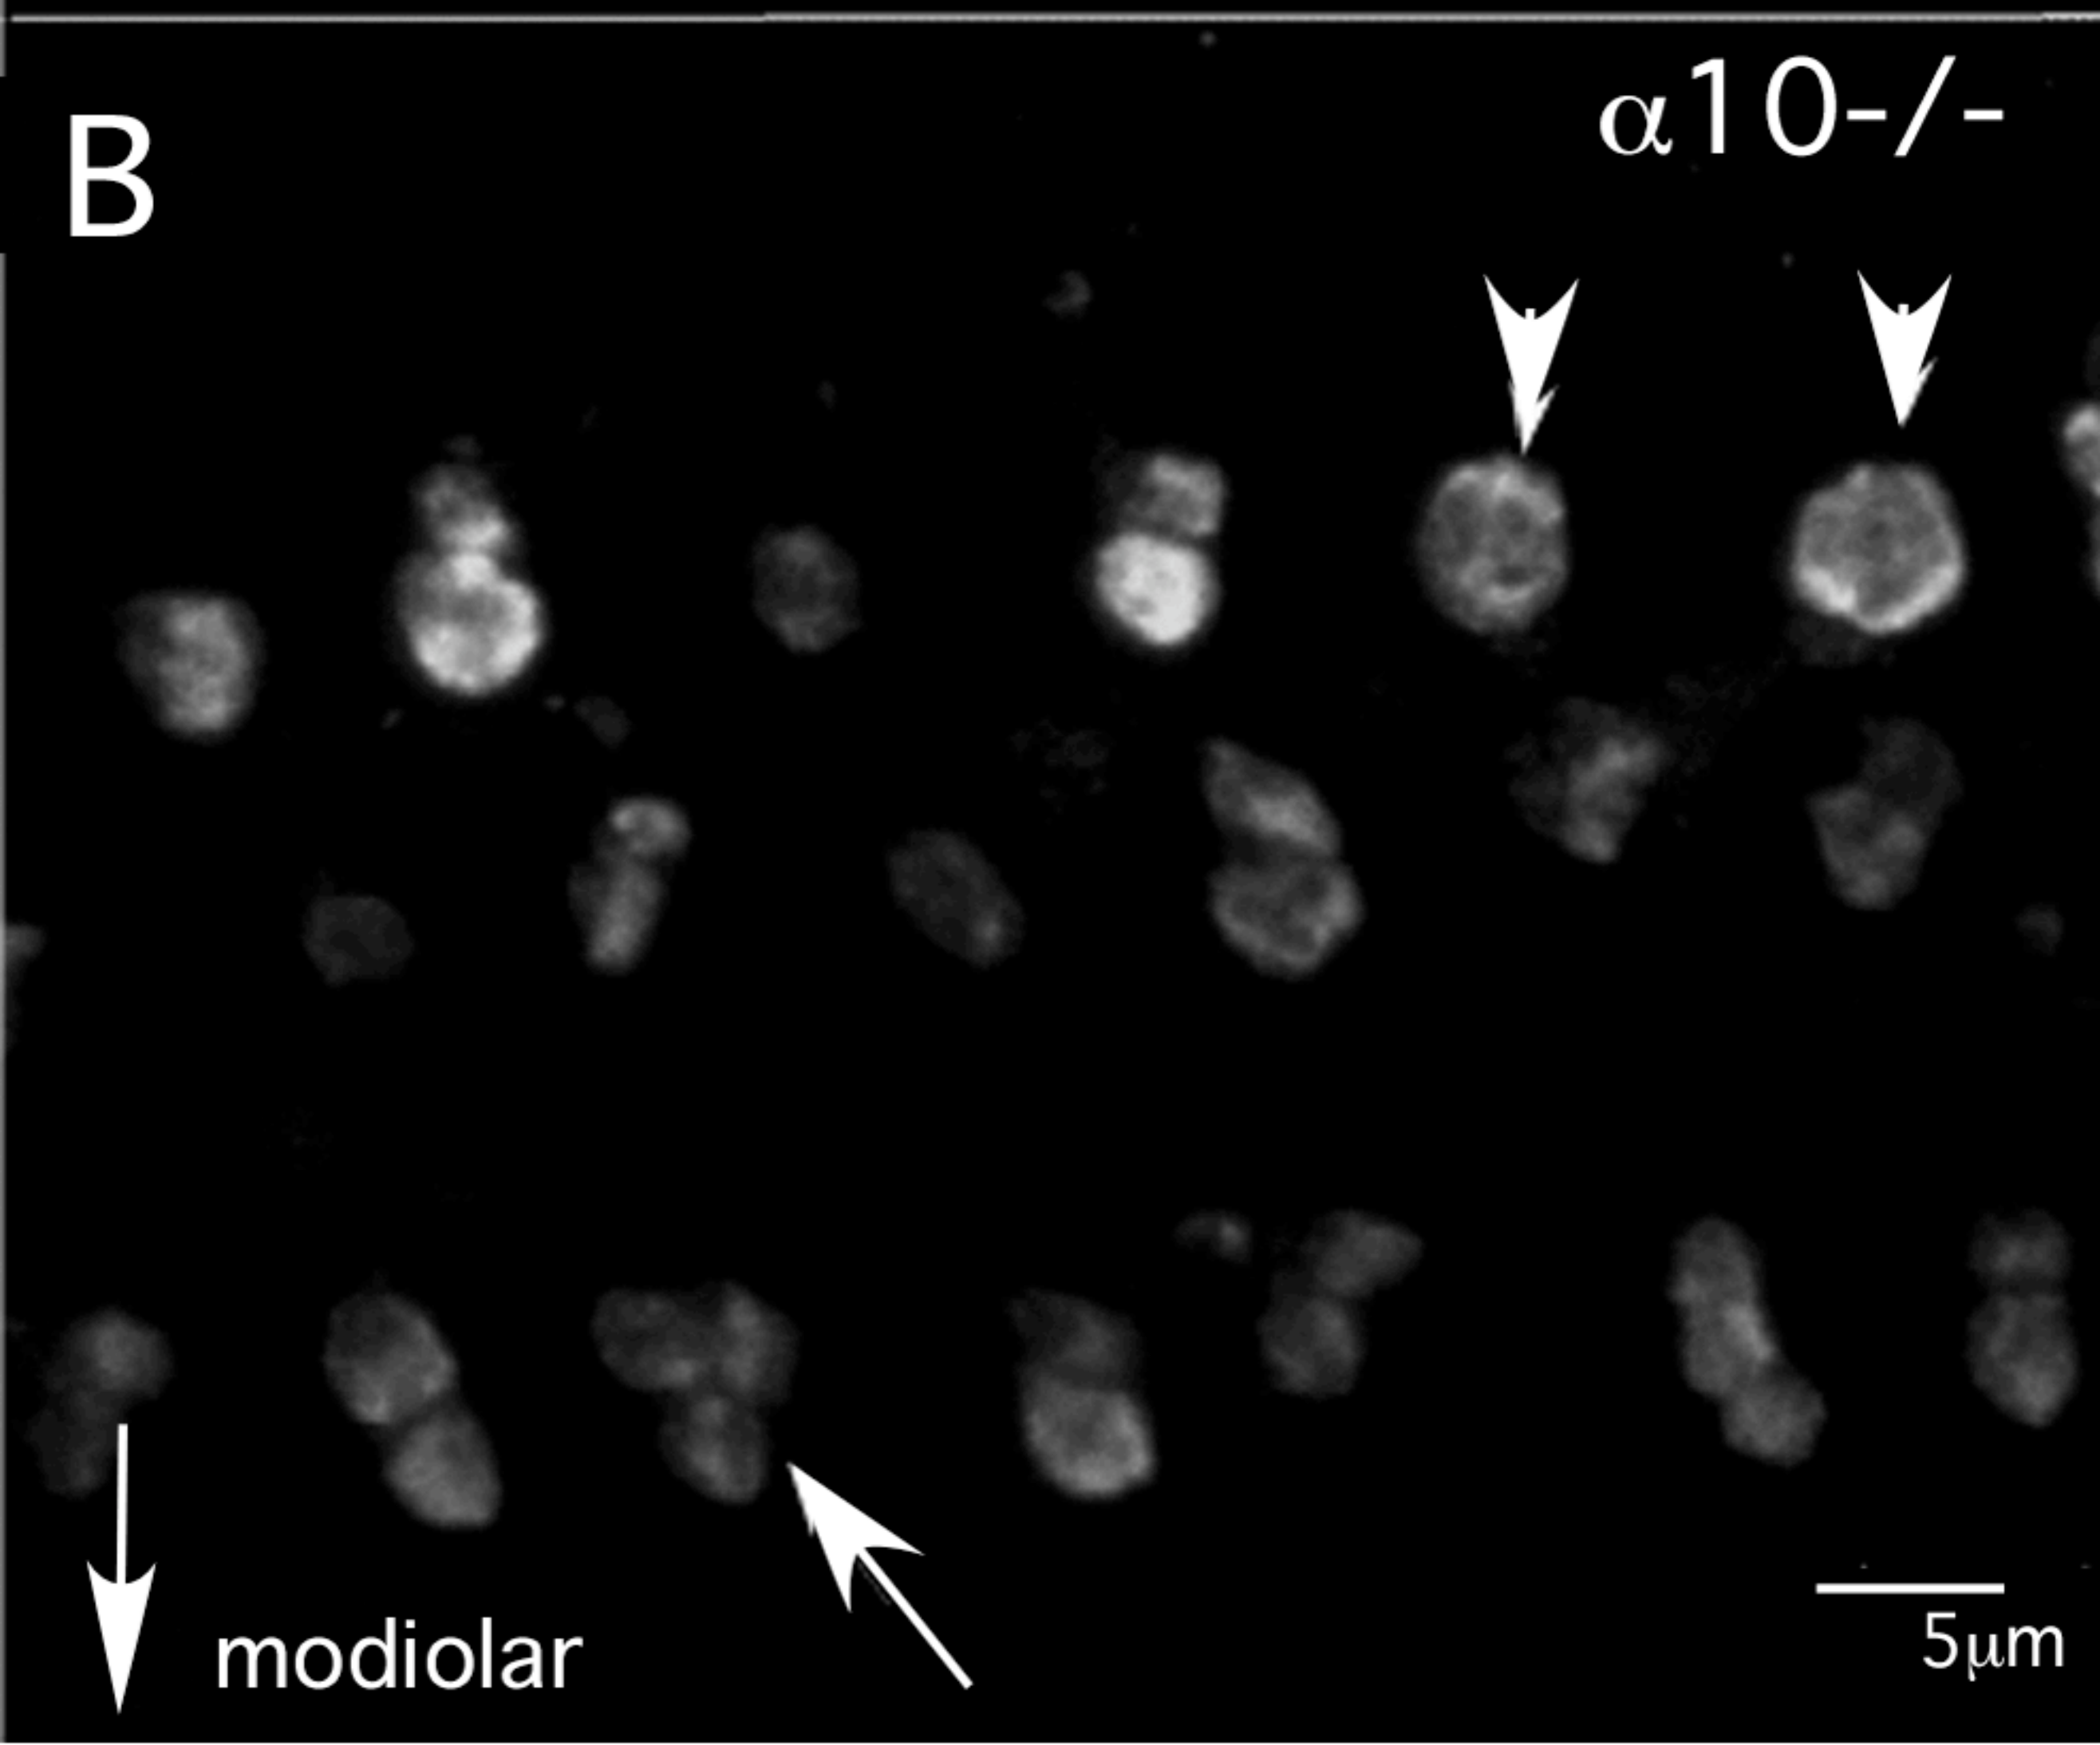

Supplement: supp_0708545105_08545Fig7.pdf [file supp_0708545105_08545Fig7.pdf]

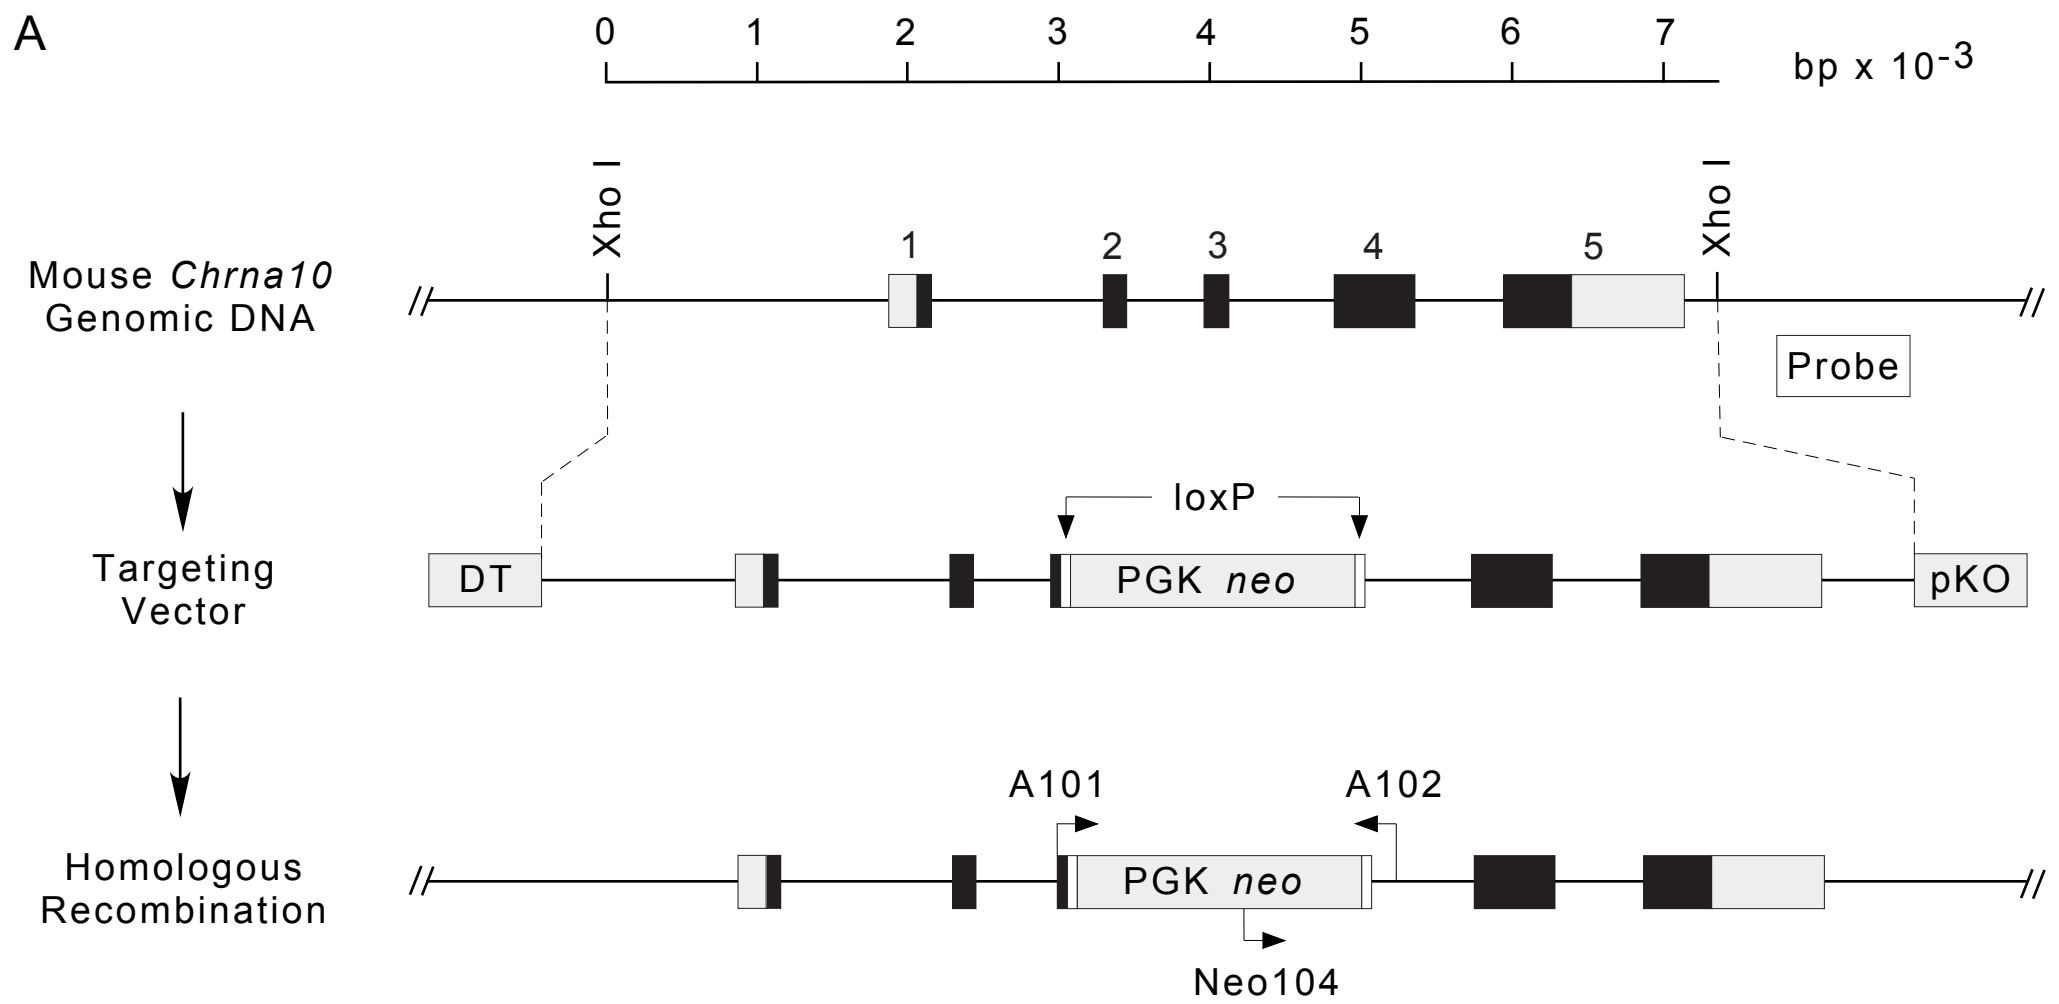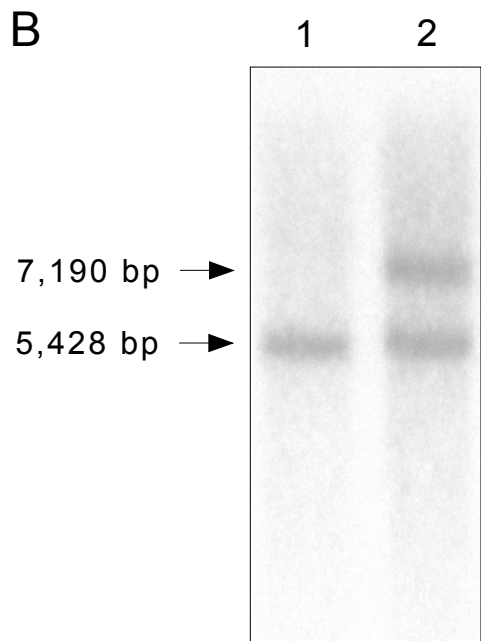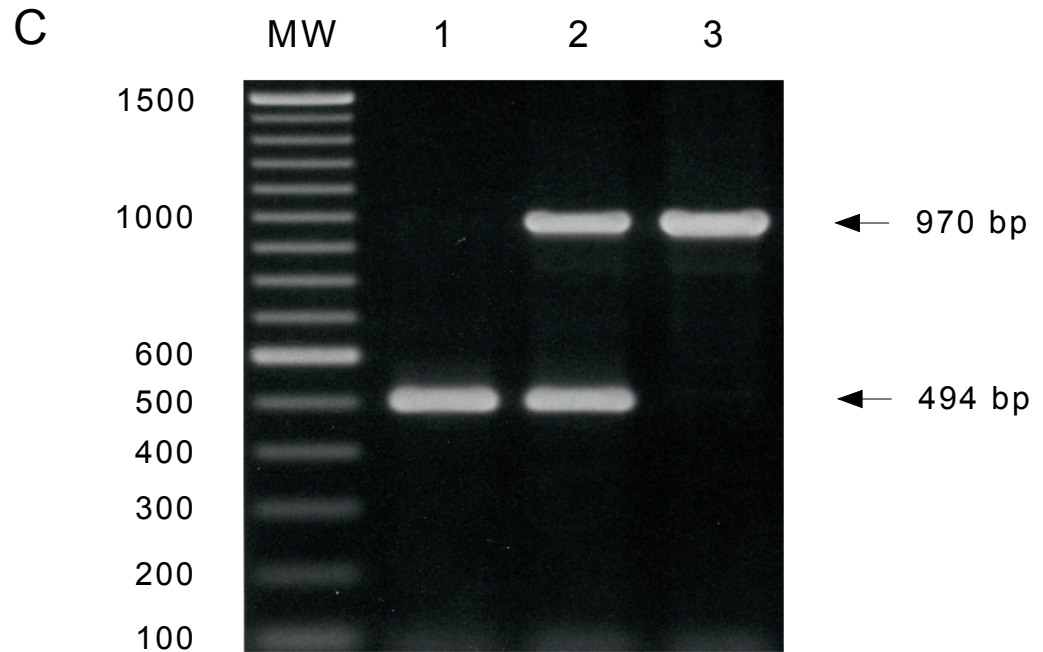

Supplement: supp_0708545105_08545Fig8.pdf [file supp_0708545105_08545Fig8.pdf]
